# Supplementary material
Source: Research Square preprint supplement (doi:10.21203/rs.3.rs-9487363/v1)
Supplement: Supplementary file 1 [file 131f429aa04104ace95001e4.docx]

*Supplementary Figure A1: European clean energy transition manufacturing investments by technology since 2016*

*
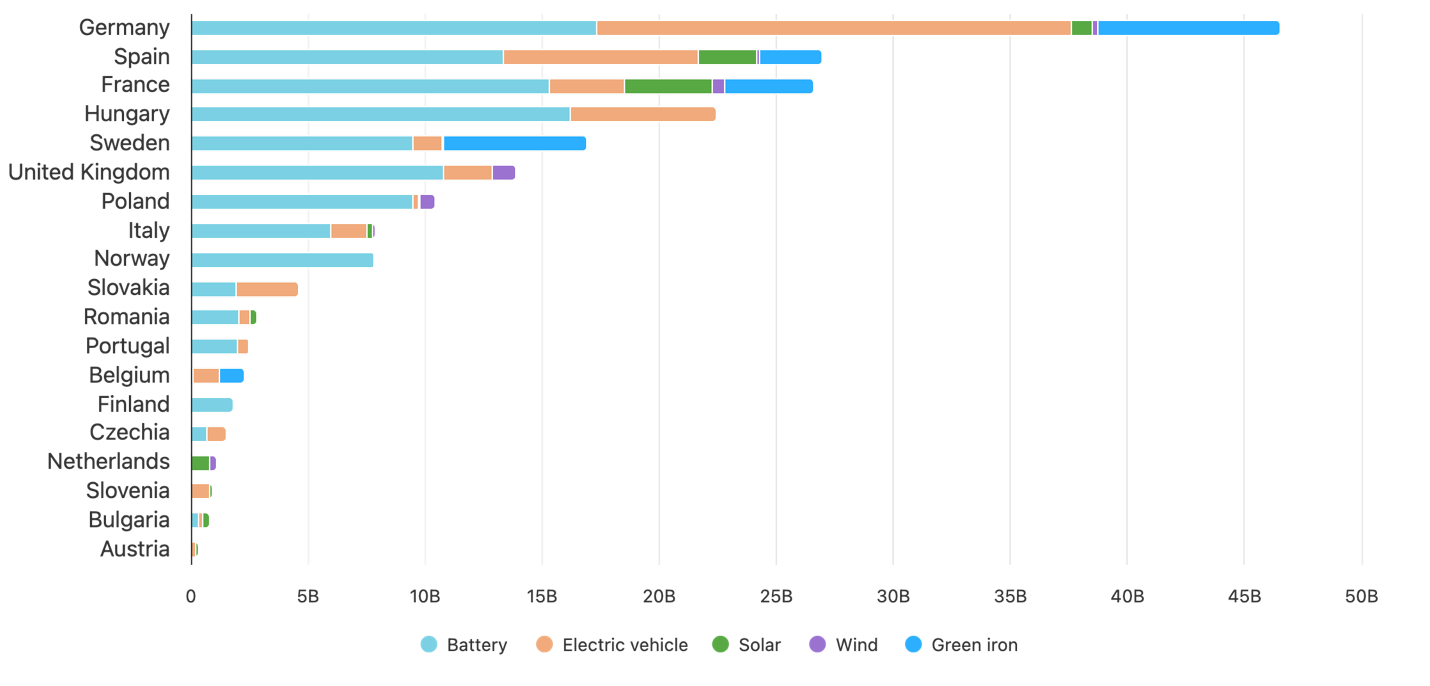
*

*Supplementary Figure A2: European clean energy transition manufacturing investments by country headquarter origin and technology since 2016*

*
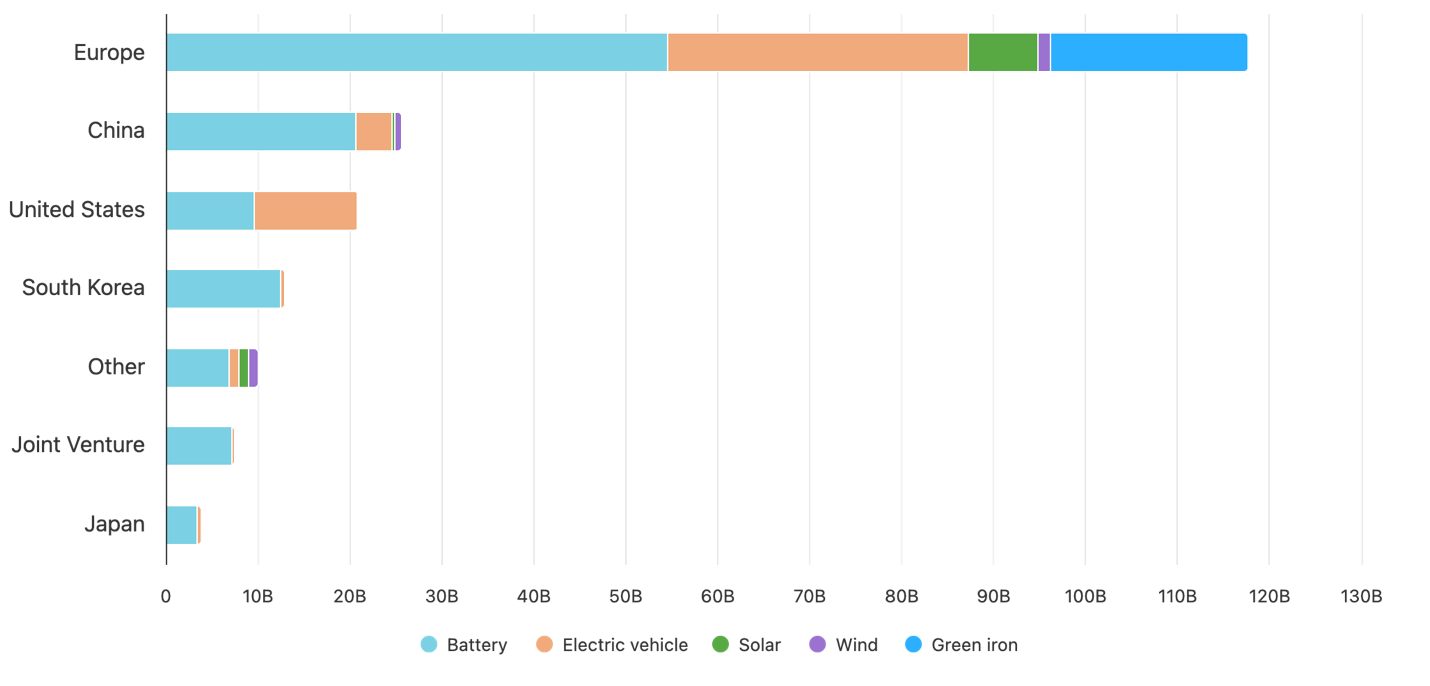
*

*Table A1: Technology and product mapping*

| *Technology* | *Product* | *Definition* |
| --- | --- | --- |
| battery | eam | Electrode active materials including anodes, cathodes, electrolytes and separators |
| battery | cell | Cell fabrication |
| battery | module_pack | Assembly of cells to form battery modules and packs |
| green iron | DRI | The direct chemical reduction of iron ore |
| solar | ingot_wafer | Polysilicon ingot pulling and wafer slicing |
| solar | cell | Cell fabrication |
| solar | module | Assembly of cells to form solar modules |
| vehicle | electric | Battery electric vehicle assembly, including plug-in hybrid |
| wind | blade | Rotor blade manufacture |
| wind | tower | Fabrication and assembly |
| wind | nacelle | Nacelle housing assembly |

*Figure A1: Full Knowledge Graph of the European Database*

*
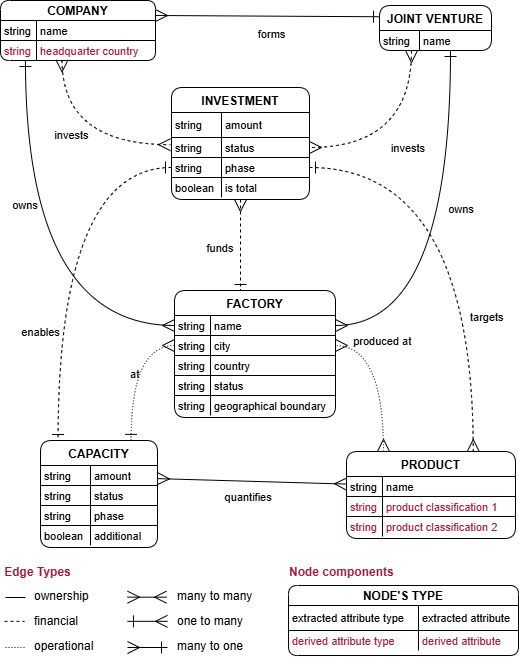
*
